# Supplementary material for: Inhibitory Effect of Natural Anti-Inflammatory Compounds on Cytokines Released by Chronic Venous Disease Patient-Derived Endothelial Cells
Source: Mediators Inflamm. 2013 Dec 31;2013:423407. doi: 10.1155/2013/423407 (PMC3893784; doi:10.1155/2013/423407)
Supplement: Supplementary file 1 — Supplementary Table 1: Main demographic and clinical characteristics of CVD patients involved in the study. Supplementary Figure 1: Western blotting validation of the specificity of the different inhibitors of the intracellular pathways activated by TNF-α. [file 423407.f1.zip]

Archive with 2 entries (2 files):
- 423407/mat.423407.v1.docx
- 423407/Supplementary Figure1.docx
